# Supplementary material
Source: HighWire-hosted journal article supplement (https://bmjopen.bmj.com/content/15/5/e093044)
Supplement: inline-supplementary-material-1 [file inline-supplementary-material-1.pdf]

Supplementary material

Perioperative SARS-CoV-2 infection and postoperative complications: a retrospective cohort study

Table of content

Supplementary Figure 1. Distribution of composites of postoperative complications..... 2

Supplementary Table 1. WHO clinical progression scale of COVID-19..... 3

Supplementary Table 2. Postoperative complications: details and corresponding ICD-10 codes..... 4

Supplementary Table 3. Preoperative comorbidities: details and corresponding ICD-10 codes..... 5

Supplementary Table 4. Definition of American Society of Anaesthesiologists (ASA) Physical Status Classification..... 6

Supplementary Table 5. Details of grade of surgery ..... 7

Supplementary Table 6. Details of urgency of surgery ..... 11

Supplementary Table 7. Patient characteristics based on absence or presence of postoperative complications ..... 12

Supplementary Table 8. Sensitivity analysis of association between preoperative and postoperative COVID-19 and risk of postoperative complications in patients undergoing elective surgery ..... 16

Supplementary Table 9. Sensitivity analysis of association between preoperative and postoperative COVID-19 and risk of postoperative complications excluding imputed data ..... 18

Supplementary Figure 2. Relationship between time from surgery to diagnosis of COVID-19 and adjusted OR for incident of postoperative complications with different surgical types..... 21

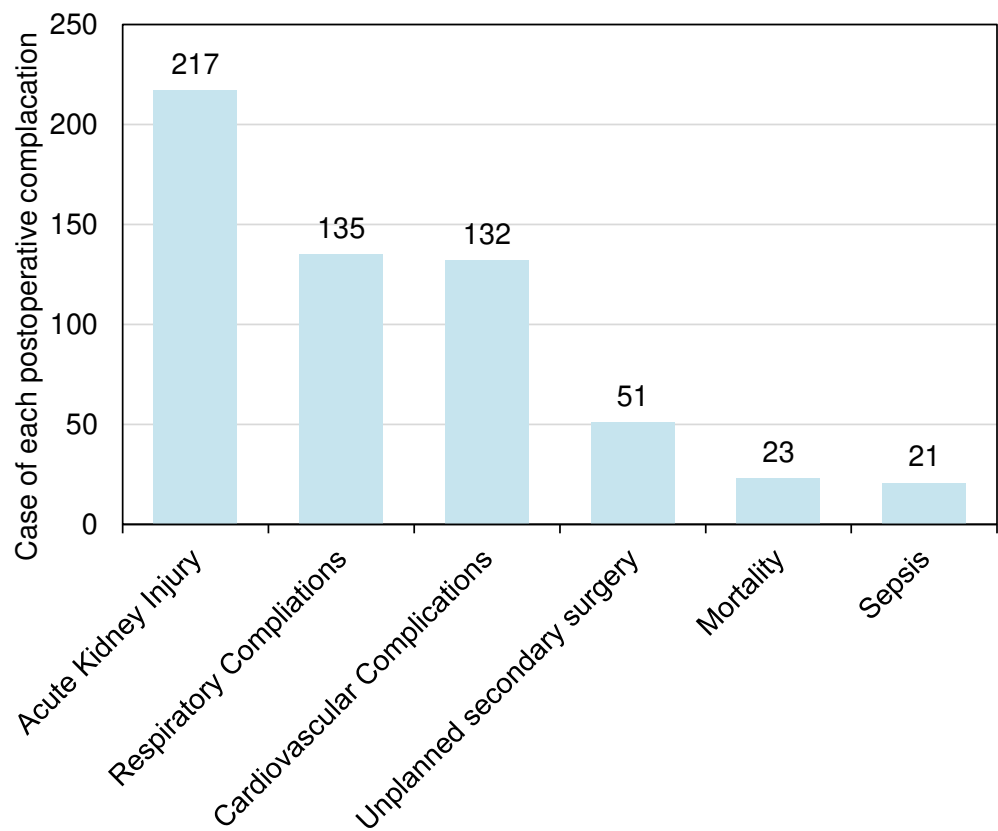

**Supplementary Figure 1.** Distribution of composites of postoperative complications

Data were presented as the number of cases. It should be noted that multiple postoperative complications may occur in a single patient.

Supplementary Table 1. WHO clinical progression scale of COVID-19

| Patient State                  | Descriptor                                                               | Score |
|--------------------------------|--------------------------------------------------------------------------|-------|
| Uninfected                     | Uninfected; no viral RNA detected                                        | 0     |
| Ambulatory mild disease        | Asymptomatic; viral RNA detected                                         | 1     |
|                                | Symptomatic; independent                                                 | 2     |
|                                | Symptomatic; assistance needed                                           | 3     |
| Hospitalised: moderate disease | Hospitalised; no oxygen therapy                                          | 4     |
|                                | Hospitalised; oxygen by mask or nasal prongs                             | 5     |
| Hospitalised: severe diseases  | Hospitalised; oxygen by NIV or high flow                                 | 6     |
|                                | Intubation and mechanical ventilation, pO2/FiO2 ≥150 or SpO2/FiO2 ≥200   | 7     |
|                                | Mechanical ventilation pO2/FiO2 <150 (SpO2/FiO2 <200) or vasopressors    | 8     |
|                                | Mechanical ventilation pO2/FiO2 <150 and vasopressors, dialysis, or ECMO | 9     |
| Dead                           | Dead                                                                     | 10    |

**Supplementary Table 2.** Postoperative complications: details and corresponding ICD-10 codes

| Postoperative complications  | Details                         | ICD-10 Codes                                              |
|------------------------------|---------------------------------|-----------------------------------------------------------|
| Respiratory complications    | Pneumonia                       | J12, J13, J14, J15, J16, J17, J18, J80, J85.802, J96, I26 |
|                              | Respiratory failure             |                                                           |
|                              | Pulmonary embolism              |                                                           |
| Cardiovascular complications | Deep vein thrombosis            | I82, I74, R09.2, I21, I49, I50, I60, I61, I62, I63, I64   |
|                              | Limb artery thrombosis          |                                                           |
|                              | Splenic infarction              |                                                           |
|                              | Hepatic infarction              |                                                           |
|                              | Cerebral hemorrhage             |                                                           |
|                              | Cerebral infarction             |                                                           |
|                              | Hypoxic-ischemic encephalopathy |                                                           |
|                              | Arrhythmia                      |                                                           |
|                              | Myocardial infarction           |                                                           |
|                              | Acute heart failure             |                                                           |
|                              | Acute ischemic heart disease    |                                                           |
|                              | Cardiac arrest                  |                                                           |
|                              | Cardiogenic shock               |                                                           |
| Acute kidney injury          |                                 | N17                                                       |
| Sepsis                       |                                 | A41                                                       |
| Unplanned secondary surgery  |                                 |                                                           |
| Mortality                    |                                 |                                                           |

**Supplementary Table 3.** Preoperative comorbidities: details and corresponding ICD-10 codes

| Preoperative comorbidities            | ICD-10 Codes                 |
|---------------------------------------|------------------------------|
| Diabetes                              | E10, E11, E13, E14           |
| Chronic obstructive pulmonary disease | J44                          |
| Diffuse emphysema                     | J43                          |
| Bronchiectasis                        | J47                          |
| Asthma                                | J45                          |
| Pulmonary fibrosis                    | J84                          |
| Lung transplantation status           | Z94                          |
| Respiratory failure                   | J96                          |
| Hypertension                          | I10, I15                     |
| Chronic heart failure                 | I50                          |
| Coronary artery disease               | I25                          |
| Cardiomyopathy                        | I42                          |
| Ventricular aneurysm                  | I25                          |
| Pericardial disease                   | I30, I31                     |
| Cerebrovascular disease               | I63, I65, I66, I67, I68, I69 |
| Chronic kidney disease                | N18                          |

**Supplementary Table 4.** Definition of American Society of Anaesthesiologists (ASA) Physical Status Classification

| ASA Classification* | Details                                                                                                                                                   |
|---------------------|-----------------------------------------------------------------------------------------------------------------------------------------------------------|
| ASA 1               | A normal healthy patient.                                                                                                                                 |
| ASA 2               | A patient with mild systemic disease.                                                                                                                     |
| ASA 3               | A patient with a severe systemic disease that is not life-threatening.                                                                                    |
| ASA 4               | A patient with a severe systemic disease that is a constant threat to life.                                                                               |
| ASA 5               | A moribund patient who is not expected to survive without the operation. The patient is not expected to survive beyond the next 24 hours without surgery. |
| ASA 6               | A brain-dead patient whose organs are being removed with the intention of transplanting them into another patient.                                        |

\*Statement on ASA Physical Status Classification System. December 13, 2020. <https://www.asahq.org/standards-and-practice-parameters/statement-on-asa-physical-status-classification-system> (accessed January 24, 2024).

**Supplementary Table 5.** Details of grade of surgery

| Surgery               | Minor                                                                                                                                       | Major                                                                                                                                                                                                                                                                                                                                                                                                                                                            |
|-----------------------|---------------------------------------------------------------------------------------------------------------------------------------------|------------------------------------------------------------------------------------------------------------------------------------------------------------------------------------------------------------------------------------------------------------------------------------------------------------------------------------------------------------------------------------------------------------------------------------------------------------------|
| Thoracic surgery      | Endoscopic thoracic;<br><br>Sympathectomy;<br><br>Chest-wall procedures;<br><br>Biopsy;<br><br>Removal of the thoracic internal<br>fixator. | Lung resection;<br><br>Lung transplant;<br><br>Esophagectomy;<br><br>Mediastinal procedures;<br><br>Chondrosternoplasty;<br><br>Correction of pectus carinatum.                                                                                                                                                                                                                                                                                                  |
| Head and neck surgery | Reduction of nasal bone;<br><br>Electrocoagulation of epistaxis;<br><br>Laryngoscopy;<br><br>Biopsy;<br><br>Tracheotomy.                    | Neck dissection;<br><br>Thyroidectomy;<br><br>Parathyroidectomy and<br>transplant;<br><br>Sinusotomy;<br><br>Cochlear implant reconstruction;<br><br>Ossicular chain reconstruction;<br><br>Stapes implantation;<br><br>Laryngectomy and<br>reconstruction;<br><br>Myringoplasty;<br><br>Parotidectomy;<br><br>Tympanoplasty;<br><br>Mastoidectomy;<br><br>Adenoidectomy;<br><br>Tonsillectomy;<br><br>Palatopharyngoplasty;<br><br>Branchial fistula resection; |

|                         |                                                                                                                                                                                       |                                                                                                                                                                                                                                                                                                                                            |
|-------------------------|---------------------------------------------------------------------------------------------------------------------------------------------------------------------------------------|--------------------------------------------------------------------------------------------------------------------------------------------------------------------------------------------------------------------------------------------------------------------------------------------------------------------------------------------|
|                         |                                                                                                                                                                                       | Deviated septum surgery;<br><br>Septoplasty;<br><br>Nasal polypectomy;<br><br>Excision of turbinates.                                                                                                                                                                                                                                      |
| Cardio-vascular surgery |                                                                                                                                                                                       | Valve procedures;<br><br>Coronary artery bypass graft;<br><br>Coronary artery transplant;<br><br>Artificial vessel replacement;<br><br>Atrial tumor resection;<br><br>Aortic aneurysm procedures;<br><br>Left ventricular outflow tract dredging;<br><br>Carotid endarterectomy;<br><br>Auricular or/and ventricular septal defect repair. |
| Digestive surgery       | Gastroscopy (diagnostic or biopsy);<br><br>Stoma closure procedures;<br>Appendicectomy;<br><br>Biopsy;<br><br>Anal fistula procedures;<br><br>Procedure for prolapse and hemorrhoids. | Gastroscopy (therapy);<br><br>Enterostomy;<br><br>Gastrectomy;<br><br>Small intestine resection;<br><br>Hemicolectomy or colectomy;<br><br>Cholecystectomy;<br><br>Pancreaticoduodenectomy;<br><br>Hepatectomy;<br><br>Liver transplant;<br><br>Biliary procedures;<br><br>Oesophagectomy;                                                 |



|                                    |                                                                                                                                                                       |                                                                                                                                                                                                                                             |
|------------------------------------|-----------------------------------------------------------------------------------------------------------------------------------------------------------------------|---------------------------------------------------------------------------------------------------------------------------------------------------------------------------------------------------------------------------------------------|
|                                    |                                                                                                                                                                       | Splenectomy;<br><br>Radiofrequency ablation of liver or pancreatic.                                                                                                                                                                         |
| Breast surgery                     | Biopsy;<br><br>Removal of breast implants;<br><br>Mammoplasty;<br><br>Quadrantectomy of the breast.                                                                   | Mastectomy                                                                                                                                                                                                                                  |
| Gynaecology and obstetrics surgery | Hysteroscopy (diagnostic);<br><br>Repair of obstetric lacerations;<br><br>Colposcopic procedures.                                                                     | Hysterectomy;<br><br>Salpingo-oophorectomy;<br><br>Hysteroscopy (therapeutic);<br><br>Caesarean section.                                                                                                                                    |
| Orthopaedics surgery               | Amputation of toe or finger;<br><br>Tendon procedures;<br><br>Arthroscopy (diagnostic);<br><br>Removal of fracture; fixation;<br><br>Biopsy;<br><br>Debridement.      | Amputation of limb;<br><br>Spinal procedures;<br><br>Arthroscopy (therapeutic);<br><br>Knee replacement;<br><br>Hip replacement;<br><br>Revision of hip or knee replacement;<br><br>Shoulder replacement;<br><br>Reduction of the fracture. |
| Other surgeries                    | Ureteroscopic procedures;<br><br>Cystoscopy (diagnostic);<br><br>Biopsy;<br><br>Ureteric stent insertion;<br><br>Orchiopexy;<br><br>Resection of hydrocele of testis; | Nephrectomy;<br><br>Adrenalectomy;<br><br>Prostatectomy;<br><br>Partial penectomy;<br><br>Pyeloureteroplasty;<br><br>Ureterocystostomy;<br><br>Nephrectomy;                                                                                 |

|  |                                                                                                                                                                 |                                                                                                                                                                                                                                                                                                               |
|--|-----------------------------------------------------------------------------------------------------------------------------------------------------------------|---------------------------------------------------------------------------------------------------------------------------------------------------------------------------------------------------------------------------------------------------------------------------------------------------------------|
|  | Posthectomy;<br><br>Scrotal procedures;<br><br>Ureteral stenting;<br><br>Excision of skin lesion;<br><br>Great saphenous vein procedures;<br><br>Hernia repair. | Cystectomy;<br><br>Transurethral resection of bladder tumour;<br><br>Kidney transplant;<br><br>Cystoscopic (therapeutic);<br><br>Procedures for kidney stones;<br><br>Renal cyst procedures;<br><br>Hypophysectomy;<br><br>Aneurysm procedures;<br><br>Spinal cord procedures;<br><br>Intracranial procedure. |
|--|-----------------------------------------------------------------------------------------------------------------------------------------------------------------|---------------------------------------------------------------------------------------------------------------------------------------------------------------------------------------------------------------------------------------------------------------------------------------------------------------|

**Supplementary Table 6.** Details of urgency of surgery

| Category          | Details                                                                                                                                                                                                                                                                         |
|-------------------|---------------------------------------------------------------------------------------------------------------------------------------------------------------------------------------------------------------------------------------------------------------------------------|
| Elective surgery  | whose indication and scheduling have been conjointly decided by the patient and the surgeon, then followed by a consultation with an anaesthesiologist occurring at least 48h prior to the date of surgery, and then definitively scheduled in the operating theatre programme. |
| Emergency surgery | unplanned urgent interventions performed in the 48 hours after the surgical indication has been set (“relative emergency”), or in the four hours after the surgical indication has been set “absolute emergency”).                                                              |

**Supplementary Table 7.** Patient characteristics based on absence or presence of postoperative complications

|                                    | Overall<br>(n=3571)  | Absence of postoperative<br>complications<br>(n=3151) | Presence of postoperative<br>complications<br>(n=420) |
|------------------------------------|----------------------|-------------------------------------------------------|-------------------------------------------------------|
| Men, n (%)                         | 1622 (45.42)         | 1401 (44.46)                                          | 221 (52.62)                                           |
| Age, years, IQR                    | 52.00 [40.00, 63.00] | 51.00 [39.00, 61.00]                                  | 59.00 [50.00, 69.00]                                  |
| BMI, kg/m <sup>2</sup> , IQR       | 23.15 [20.93, 25.19] | 23.12 [20.93, 25.20]                                  | 23.21 [20.87, 25.04]                                  |
| Smoking, n (%)                     | 440 (12.32)          | 369 (11.71)                                           | 71 (16.90)                                            |
| Diagnosis of COVID-19, n (%)       |                      |                                                       |                                                       |
| No COVID-19                        | 959 (26.86)          | 856 (27.17)                                           | 103 (24.52)                                           |
| Preoperative COVID-19              | 1871 (52.39)         | 1657 (52.59)                                          | 214 (50.95)                                           |
| Postoperative COVID-19             | 741 (20.75)          | 638 (20.25)                                           | 103 (24.52)                                           |
| COVID-19 vaccination status, n (%) | 3318 (92.92)         | 2943 (93.40)                                          | 375 (89.29)                                           |
| Severity of COVID-19, n (%)        |                      |                                                       |                                                       |
| Mild                               | 2461 (94.22)         | 2200 (95.86)                                          | 261 (82.33)                                           |

|                                 |              |              |             |
|---------------------------------|--------------|--------------|-------------|
| Moderate/Severe                 | 151 (5.78)   | 95 (4.14)    | 56 (17.67)  |
| Number of comorbidities*, n (%) |              |              |             |
| 0                               | 2323 (65.05) | 2221 (70.49) | 102 (24.29) |
| 1                               | 112 (3.14)   | 97 (3.08)    | 15 (3.57)   |
| 2                               | 519 (14.53)  | 414 (13.14)  | 105 (25.00) |
| 3                               | 364 (10.19)  | 260 (8.25)   | 104 (24.76) |
| ≥4                              | 253 (7.08)   | 159 (5.05)   | 94 (22.38)  |
| History of cancer, n (%)        | 1296 (36.29) | 1200 (38.08) | 96 (22.86)  |
| ASA classification, n (%)       |              |              |             |
| Grade 1-2                       | 3048 (85.35) | 2843 (90.23) | 205 (48.81) |
| Grade 3-5                       | 523 (14.65)  | 308 (9.77)   | 215 (51.19) |
| Grade of surgery, n (%)         |              |              |             |
| Minor                           | 1349 (37.78) | 1250 (39.67) | 99 (23.57)  |
| Major                           | 2222 (62.22) | 1901 (60.33) | 321 (76.43) |
| Urgent of surgery, n (%)        |              |              |             |

|                             |              |              |             |
|-----------------------------|--------------|--------------|-------------|
| Elective                    | 3339 (93.50) | 2979 (94.54) | 360 (85.71) |
| Emergency                   | 232 (6.50)   | 172 (5.46)   | 60 (14.29)  |
| Duration of surgery, n (%)  |              |              |             |
| ≤240 minutes                | 3060 (85.69) | 2800 (88.86) | 260 (61.90) |
| >240 minutes                | 511 (14.31)  | 351 (11.14)  | 160 (38.10) |
| General anesthesia, n (%)   | 3402 (95.27) | 2998 (95.14) | 404 (96.19) |
| Type of surgery, n (%)      |              |              |             |
| Thoracic                    | 821 (22.99)  | 762 (24.18)  | 59 (14.05)  |
| Head and Neck               | 518 (14.51)  | 496 (15.74)  | 22 (5.24)   |
| Cardio-vascular             | 336 (9.41)   | 172 (5.46)   | 164 (39.05) |
| Digestive                   | 444 (12.43)  | 385 (12.22)  | 59 (14.05)  |
| Breast                      | 371 (10.39)  | 366 (11.62)  | 5 (1.19)    |
| Gynaecologic and Obstetrics | 317 (8.88)   | 305 (9.68)   | 12 (2.86)   |
| Orthopadic                  | 276 (7.73)   | 256 (8.12)   | 20 (4.76)   |
| Other surgeries‡            | 488 (13.67)  | 409 (12.98)  | 79 (18.81)  |

Continuous variables are described as median (Interquartile Range, IQR), and categorical variables are described as number (percent).

\*Comorbidities included diabetes, chronic obstructive pulmonary disease, diffuse emphysema, bronchiectasis, asthma, pulmonary fibrosis, lung transplantation status, respiratory failure, hypertension, coronary artery disease, chronic heart failure, cardiomyopathy, ventricular aneurysm, pericardial disease, cerebrovascular disease, and chronic kidney disease.

‡Other surgeries included urologic surgery, interventional surgery, plastic surgery, hernia surgery, and neurosurgery.

ASA Classification = American Society of Anaesthesiologists Physical Status Classification. COVID-19=Coronavirus disease 2019. BMI = body mass index.

**Supplementary Table 8.** Sensitivity analysis of association between preoperative and postoperative COVID-19 and risk of postoperative complications in patients undergoing elective surgery

|                                            |                 | Postoperative complications |         |                   |         |                   |         |
|--------------------------------------------|-----------------|-----------------------------|---------|-------------------|---------|-------------------|---------|
|                                            |                 | Model 1                     |         | Model 2           |         | Model 3           |         |
|                                            |                 | OR (95%CI)                  | p value | OR (95%CI)        | p value | OR (95%CI)        | p value |
| Preoperative COVID-19 vs No COVID-19       |                 |                             |         |                   |         |                   |         |
| Time from surgery to diagnosis of COVID-19 |                 |                             |         |                   |         |                   |         |
| No COVID-19                                | 88/903 (9.75)   | Ref.                        |         | Ref.              |         | Ref.              |         |
| Pre-1w                                     | 17/100 (17.00)  | 2.11 (1.19, 3.75)           | 0.011   | 2.22 (1.20, 4.12) | 0.012   | 2.84 (1.48, 5.46) | 0.002   |
| Pre-2w                                     | 22/122 (18.03)  | 2.25 (1.34, 3.78)           | 0.002   | 2.67 (1.53, 4.69) | 0.001   | 2.62 (1.43, 4.77) | 0.002   |
| Pre-3w                                     | 15/137 (10.95)  | 1.26 (0.70, 2.27)           | 0.43    | 1.28 (0.69, 2.37) | 0.43    | 1.39 (0.73, 2.66) | 0.32    |
| Pre-4w or more                             | 132/1382 (9.55) | 1.06 (0.80, 1.42)           | 0.68    | 1.13 (0.84, 1.53) | 0.41    | 1.23 (0.89, 1.69) | 0.20    |
| Postoperative COVID-19 vs No COVID-19      |                 |                             |         |                   |         |                   |         |
| Time from surgery to diagnosis of COVID-19 |                 |                             |         |                   |         |                   |         |
| No COVID-19                                | 88/903 (9.75)   | Ref.                        |         | Ref.              |         | Ref.              |         |



|                 |                |                   |       |                   |       |                   |       |
|-----------------|----------------|-------------------|-------|-------------------|-------|-------------------|-------|
| Post-1w         | 24/157 (15.29) | 1.90 (1.15, 3.12) | 0.012 | 1.73 (1.00, 2.99) | 0.048 | 1.95 (1.09, 3.50) | 0.026 |
| Post-2w         | 21/162 (12.96) | 1.54 (0.92, 2.59) | 0.10  | 1.65 (0.94, 2.92) | 0.08  | 2.02 (1.11, 3.67) | 0.021 |
| Post-3w         | 21/170 (12.35) | 1.63 (0.97, 2.74) | 0.07  | 2.19 (1.24, 3.85) | 0.007 | 2.51 (1.37, 4.59) | 0.003 |
| Post-4w or more | 20/206 (9.71)  | 1.11 (0.66, 1.87) | 0.69  | 1.19 (0.68, 2.09) | 0.55  | 1.19 (0.65, 2.18) | 0.57  |

Model 1: Adjusted for age (continuous) and sex (men or women).

Model 2: Additionally adjusted for BMI (continuous), smoking (yes or no), COVID-19 vaccination status (yes or no), number of comorbidities (0, 1, 2, 3, and ≥4), and history of cancer (yes or no).

Model 3: Further adjusted for ASA classification (grade 1-2 or grade 3-5), grade of surgery (minor or major), urgency of surgery (elective or emergency), duration of surgery (≤240 minutes or >240 minutes), general anesthetic (yes or no) and type of surgery (Thoracic, Head and neck, Cardio-vascular, Digestive, Breast, Gynaecologic and obstetrics, Orthopadic, and Other surgeries).

**Supplementary Table 9.** Sensitivity analysis of association between preoperative and postoperative COVID-19 and risk of postoperative complications excluding imputed data

|                                            |                 | Postoperative complications |         |                   |         |                   |         |
|--------------------------------------------|-----------------|-----------------------------|---------|-------------------|---------|-------------------|---------|
|                                            |                 | Model 1                     |         | Model 2           |         | Model 3           |         |
|                                            |                 | OR (95% CI)                 | p value | OR (95% CI)       | p value | OR (95% CI)       | p value |
| Preoperative COVID-19 vs No COVID-19       |                 |                             |         |                   |         |                   |         |
| Time from surgery to diagnosis of COVID-19 |                 |                             |         |                   |         |                   |         |
| No-COVID-19                                | 82/815 (10.06)  | Ref.                        |         | Ref.              |         | Ref.              |         |
| Pre-1w                                     | 13/82 (15.85)   | 1.84 (0.97, 3.51)           | 0.06    | 2.15 (1.07, 4.31) | 0.031   | 2.54 (1.22, 5.25) | 0.012   |
| Pre-2w                                     | 14/97 (14.43)   | 1.69 (0.91, 3.14)           | 0.10    | 2.08 (1.07, 4.03) | 0.030   | 2.40 (1.20, 4.79) | 0.013   |
| Pre-3w                                     | 11/114 (9.65)   | 1.01 (0.52, 1.97)           | 0.98    | 1.03 (0.51, 2.07) | 0.94    | 1.17 (0.57, 2.40) | 0.67    |
| Pre-4w or more                             | 121/1226 (9.87) | 1.05 (0.78, 1.42)           | 0.74    | 1.13 (0.82, 1.54) | 0.46    | 1.25 (0.90, 1.75) | 0.19    |
| Postoperative COVID-19 vs No COVID-19      |                 |                             |         |                   |         |                   |         |
| Time from surgery to diagnosis of COVID-19 |                 |                             |         |                   |         |                   |         |
| No COVID-19                                | 82/815 (10.06)  | Ref.                        |         | Ref.              |         | Ref.              |         |

|                 |                |                   |       |                   |       |                   |       |
|-----------------|----------------|-------------------|-------|-------------------|-------|-------------------|-------|
| Post-1w         | 20/131 (15.27) | 1.77 (1.04, 3.04) | 0.037 | 1.84 (1.03, 3.30) | 0.041 | 1.93 (1.04, 3.58) | 0.036 |
| Post-2w         | 16/142 (11.27) | 1.26 (0.71, 2.25) | 0.42  | 1.42 (0.76, 2.66) | 0.27  | 1.58 (0.82, 3.05) | 0.17  |
| Post-3w         | 16/156 (10.26) | 1.22 (0.69, 2.16) | 0.50  | 1.69 (0.91, 3.12) | 0.10  | 1.89 (0.99, 3.59) | 0.05  |
| Post-4w or more | 21/189 (11.11) | 1.25 (0.75, 2.10) | 0.40  | 1.29 (0.74, 2.27) | 0.37  | 1.17 (0.64, 2.15) | 0.60  |

Model 1: Adjusted for age (continuous) and sex (men or women).

Model 2: Additionally adjusted for BMI (continuous), smoking (yes or no), COVID-19 vaccination status (yes or no), number of comorbidities (0, 1, 2, 3, and ≥4), and history of cancer (yes or no).

Model 3: Further adjusted for ASA classification (grade 1-2 or grade 3-5), grade of surgery (minor or major), urgency of surgery (elective or emergency), duration of surgery (≤240 minutes or >240 minutes), general anesthetic (yes or no) and type of surgery (Thoracic, Head and neck, Cardio-vascular, Digestive, Breast, Gynaecologic and obstetrics, Orthopadic, and Other surgeries).

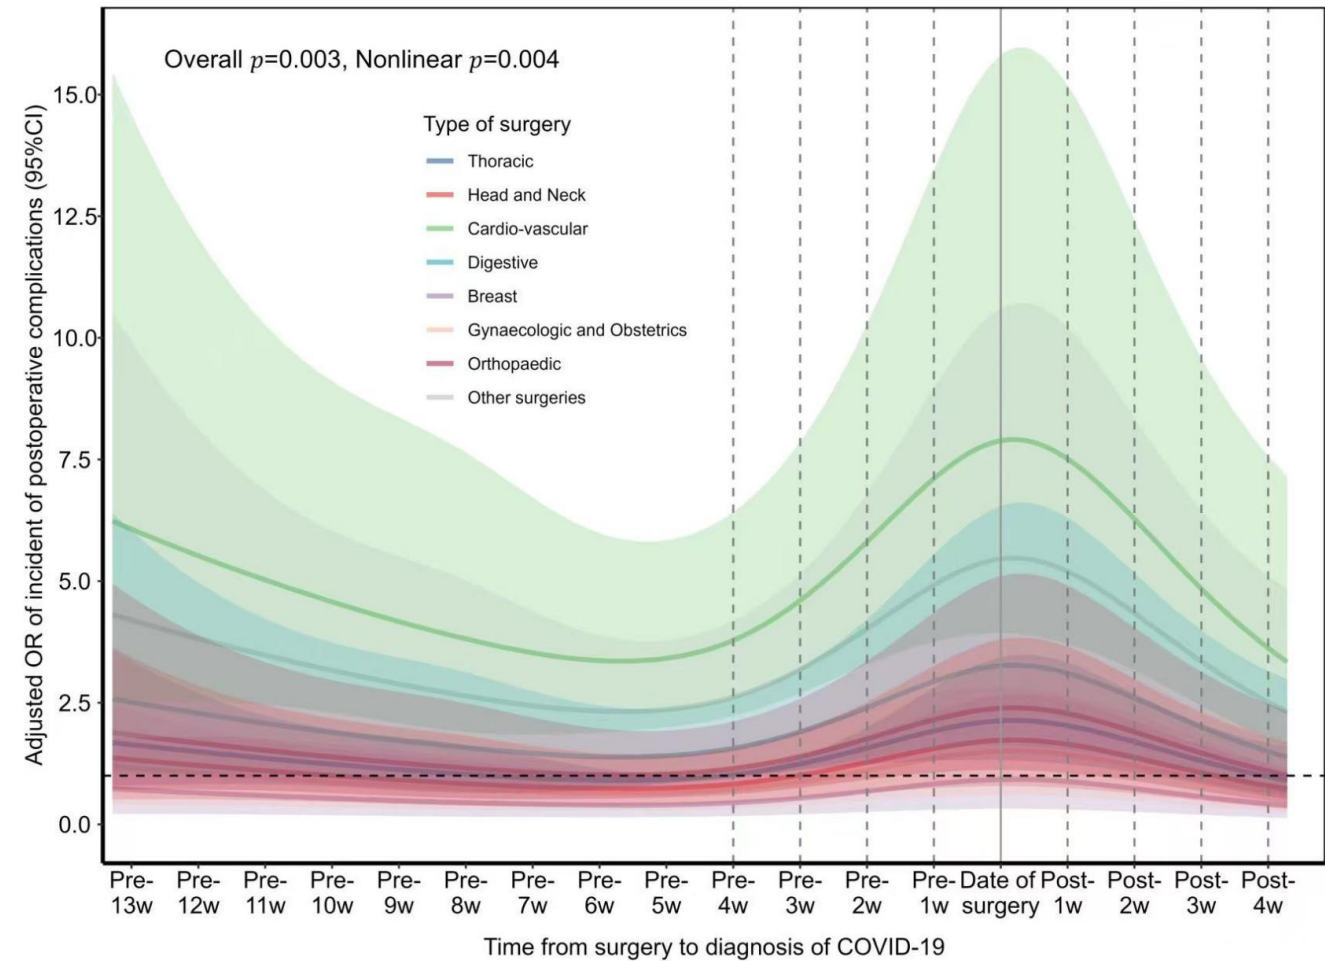

**Supplementary Figure 2.** Relationship between time from surgery to diagnosis of COVID-19 and adjusted OR for incident of postoperative complications with different surgical types.

Included 2612 patients with perioperative COVID-19. On the X-axis, Pre means patients with Preoperative COVID-19, and Post means patients with Postoperative COVID-19.
